# Supplementary material for: Molecular prevalence of HBB-associated hemoglobinopathy among reproductive-age adults and the prenatal diagnosis in Jiangxi Province, southern central China
Source: PubMed Central journal article supplement (PMC9554255; doi:10.3389/fgene.2022.992073), 2022-09-28
Supplement: Table1.pdf [file Table1.pdf]

|                                                     |                                                     |                                                             |           |            |
|-----------------------------------------------------|-----------------------------------------------------|-------------------------------------------------------------|-----------|------------|
| $\alpha\alpha/--SEA, \beta^N\beta^{-28}$            | $\alpha\alpha/\alpha\alpha, \beta^N\beta^{654}$     | $\alpha\alpha/--SEA, \beta^N\beta^{-28}$                    | 1         | Continued  |
| $\alpha\alpha/-\alpha 3.7, \beta^N\beta^{-28}$      | $\alpha\alpha/\alpha\alpha, \beta^N\beta^{654}$     | $\alpha\alpha/\alpha\alpha, \beta^N\beta^N$                 | 1         | Continued  |
| $\alpha\alpha/-\alpha 4.2, \beta^N\beta^{654}$      | $\alpha\alpha/--SEA, \beta^N\beta^{654}$            | $-\alpha 4.2/--SEA, \beta^N\beta^{654}$                     | 1         | Continued  |
| $\alpha\alpha/-\alpha 3.7, \beta^N\beta^{654}$      | $\alpha\alpha/\alpha\alpha, \beta^N\beta^{-28}$     | $\alpha\alpha/-\alpha 3.7, \beta^N\beta^N$                  | 1         | Continued  |
| $\alpha\alpha/\alpha\alpha, \beta^N\beta^{CD41-42}$ | $\alpha\alpha/\alpha\alpha, \beta^N\beta^{CD27/28}$ | $\alpha\alpha/-\alpha 3.7, \beta^{CD41-42}/\beta^{CD27/28}$ | 1         | Terminated |
| $\alpha\alpha/\alpha\alpha, \beta^N\beta^{CD27/28}$ | $-\alpha 3.7/--SEA, \beta^N\beta^{654}$             | $\alpha\alpha/-\alpha 3.7, \beta^N\beta^{654}$              | 1         | Continued  |
| <b>Total</b>                                        | /                                                   | /                                                           | <b>77</b> | /          |

Notes:  $\beta^{-28}$  indicates the mutation -28 (A>G).
